# Supplementary material for: Taming age mortality in semi-captive Asian elephants
Source: PubMed Central journal article supplement (PMC7002507; doi:10.1038/s41598-020-58590-7), 2020-02-05
Supplement: 41598_2020_58590_MOESM1_ESM.pdf [file 41598_2020_58590_MOESM1_ESM.pdf]

# Taming age mortality in semi-captive Asian elephants

Jennie A. H. Crawley, Mirkka Lahdenperä, Zaw Min Oo, Win Htut, Hnin Nan Dar, Virpi Lummaa

## Supplementary Information

### Causes of Death

We loosely group causes of death similarly to Lynsdale et al. (2017), into *parasites* (total n=28) : parasites (1), worms (8) thut (3), bots (8), liver fluke (2), filariasis (6), *infectious diseases* (total n=30): anthrax (7), septicemia (7), herpes virus (2), tetanus (3), lung infection (2), pneumonia (9), *gastro-intestinal* (total n=14): enteritis (2), constipation (5), diarrhea (5), food poisoning (2), *exhaustion* (total n=22): general weakness (19), heat stroke (3), *injury* (total n=16): fall (12), suffocation (1), strangled (3), or *other* (total n=61):, heart attack (2), joint illness (1), liver abscess (1), sudden death (1), taming stress (33), unknown (15), anaemia (3), unknown disease (3), fat embolism (2).

**Table S1. Glmer output of the effect of calf and maternal traits on survival at taming age (4.0-5.5 years) including a quadratic mother's age term.** Estimates are expressed on the logit scale. The \* symbol indicates statistical significance and : represents an interaction. Reference sex is female, birth order is first-born, and birth cohort 1970-79, n=1947.

| <b>Fixed effects</b>                                    | <b>Estimate ± SE</b> | <b>z-value</b> |
|---------------------------------------------------------|----------------------|----------------|
| <b>(Intercept)</b>                                      | -2.13 ± 0.49         | -4.38*         |
| <b>Sex (Male)</b>                                       | 0.18 ± 0.17          | 1.10           |
| <b>Month Birth</b>                                      | 0.05 ± 0.02          | 2.06*          |
| <b>Birth Order (2<sup>rd</sup>-3<sup>rd</sup> born)</b> | -0.05 ± 0.20         | -0.26          |
| <b>Birth Order (4<sup>th</sup>+ born)</b>               | -0.82 ± 0.29         | -2.81*         |
| <b>Mother's Age</b>                                     | -0.04 ± 0.54         | -0.08          |
| <b>Mother's Age<sup>2</sup></b>                         | 0.27 ± 0.52          | 0.52           |
| <b>Mother's origin: Time since capture</b>              | -0.09 ± 0.07         | -1.39          |
| <b>Birth Cohort (1980-89)</b>                           | -0.25 ± 0.21         | -1.23          |
| <b>Birth Cohort (1990-99)</b>                           | -0.20 ± 0.23         | -0.89          |
| <b>Birth Cohort (2000-13)</b>                           | -1.38 ± 0.34         | -4.03*         |
| <b>Random effects</b>                                   | <b>Variance ± SD</b> |                |
| <b>Location</b>                                         | 1.09 ± 1.04          |                |

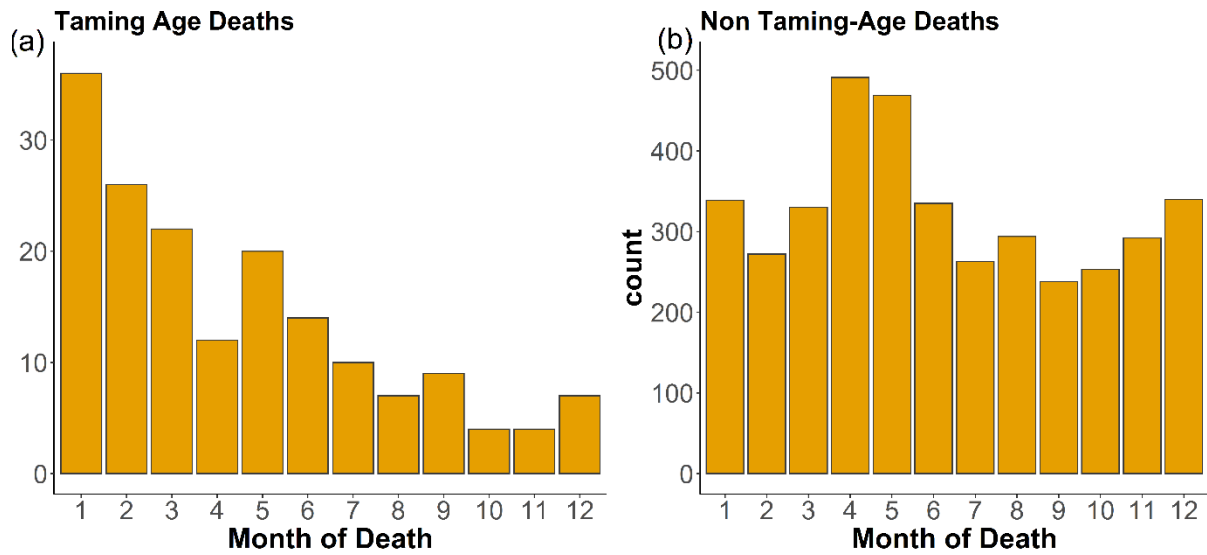

**Figure S1. Distribution of deaths across in the year in (a) elephants of taming age (4.0-5.5 years, n=171) and (b) all other ages (n=3916). Month numbers correspond to months in a calendar year (ie. 1=January, 2=February etc).**
